# Supplementary material for: Adherence to SARS-CoV-2 Vaccination Recommendations among Patients with Substance Use Disorders: A Cross-Sectional Study in Rome, Italy
Source: MDPI journal article supplement (doi:10.3390/vaccines11091434), 2023-08-30
Supplement: s1 [file s1]

**Table S1.** Formula used in the sample size (s) calculation.

|                                                                 |                                                           |
|-----------------------------------------------------------------|-----------------------------------------------------------|
| $s = (Z^2 p (1-p) / m^2) / [1 + ((Z^2 p (1-p) / m^2) - 1) / P]$ |                                                           |
| Z                                                               | z-value (1.96)                                            |
| p                                                               | proportion of population with the expected outcome (0.82) |
| m                                                               | margin of error (0.05)                                    |
| P                                                               | total population (1645).                                  |

**Table S2.** Survey questionnaire.

Date \_\_\_\_/\_\_\_\_/\_\_\_\_ Place \_\_\_\_\_

|                                                                                                |                 |
|------------------------------------------------------------------------------------------------|-----------------|
| 1. Weight _____                                                                                | 2. Height _____ |
| 3. Sex <input type="checkbox"/> M <input type="checkbox"/> F                                   | 4. Age _____    |
| 5. Nationality <input type="checkbox"/> Italian <input type="checkbox"/> Other (specify) _____ |                 |

6. Highest degree?

- ☐ None
- ☐ Primary school
- ☐ Secondary school
- ☐ High school
- ☐ Bachelor's degree

7. Work condition?

- ☐ Unemployed
- ☐ Occasional employment
- ☐ Part-time
- ☐ Full-time
- ☐ Student
- ☐ Retired
- ☐ Freelance
- ☐ Other

8. Housing?

|                                                            |                       |               |
|------------------------------------------------------------|-----------------------|---------------|
| <input type="checkbox"/> Alone                             | Go to question 9      |               |
| <input type="checkbox"/> Dormitory                         |                       |               |
| <input type="checkbox"/> Unstable (e.g., a friend's house) |                       |               |
| <input type="checkbox"/> Homeless                          |                       |               |
| <input type="checkbox"/> Sharing an apartment              | 8.1. How many people? | (number)_____ |

|  |                          |                                                                          |
|--|--------------------------|--------------------------------------------------------------------------|
|  | 8.2. Over 65 years old?  | <input type="checkbox"/> Yes (number)____<br><input type="checkbox"/> No |
|  | 8.3. Under 18 years old? | <input type="checkbox"/> Yes (number)____<br><input type="checkbox"/> No |

9. Which of the following ones is applicable to you?

|                                                                             |                                                                                                                                                                |
|-----------------------------------------------------------------------------|----------------------------------------------------------------------------------------------------------------------------------------------------------------|
| <input type="checkbox"/> I contracted COVID-19                              | 9.1 Where the diagnosis was made?<br><input type="checkbox"/> during hospitalization/in the hospital<br><br><input type="checkbox"/> by local health unit swab |
| <input type="checkbox"/> I have been in contact with a person with COVID-19 | Go to question 10                                                                                                                                              |
| <input type="checkbox"/> I had symptoms but did not run further tests       |                                                                                                                                                                |
| <input type="checkbox"/> None of the above                                  |                                                                                                                                                                |

10. Have you ever been tested before for COVID-19?

|                                               |                                                                                                                                                                                                                                                                                           |
|-----------------------------------------------|-------------------------------------------------------------------------------------------------------------------------------------------------------------------------------------------------------------------------------------------------------------------------------------------|
| <input type="checkbox"/> Yes, it was negative | 10.1 If yes, recommended by who?<br><input type="checkbox"/> Hospital staff<br><input type="checkbox"/> General practitioner<br><input type="checkbox"/> Self<br><input type="checkbox"/> Employer<br><input type="checkbox"/> Villa Maraini Foundation<br><input type="checkbox"/> Other |
| <input type="checkbox"/> Yes, it was positive |                                                                                                                                                                                                                                                                                           |
| <input type="checkbox"/> No                   | Go to question 11                                                                                                                                                                                                                                                                         |

11. Have you ever done a serological test for COVID-19 antibodies?

|                                               |                                                                                                                                                                                                                                                                                           |
|-----------------------------------------------|-------------------------------------------------------------------------------------------------------------------------------------------------------------------------------------------------------------------------------------------------------------------------------------------|
| <input type="checkbox"/> Yes, it was negative | 11.1 If yes, recommended by who?<br><input type="checkbox"/> Hospital staff<br><input type="checkbox"/> General practitioner<br><input type="checkbox"/> Self<br><input type="checkbox"/> Employer<br><input type="checkbox"/> Villa Maraini Foundation<br><input type="checkbox"/> Other |
| <input type="checkbox"/> Yes, it was positive |                                                                                                                                                                                                                                                                                           |
| <input type="checkbox"/> No                   | Go to question 12                                                                                                                                                                                                                                                                         |

12. Have you ever experienced the following symptoms since the beginning of the pandemic?  
(multiple options can be selected)

- |                                        |                                               |
|----------------------------------------|-----------------------------------------------|
| <input type="checkbox"/> Fever         | <input type="checkbox"/> Breathlessness       |
| <input type="checkbox"/> Cough         | <input type="checkbox"/> Asthenia             |
| <input type="checkbox"/> Sore throat   | <input type="checkbox"/> Conjunctivitis       |
| <input type="checkbox"/> Loss of taste | <input type="checkbox"/> Unusual muscle aches |
| <input type="checkbox"/> Loss of smell | <input type="checkbox"/> Diarrhea             |
| <input type="checkbox"/> Cold          | <input type="checkbox"/> None →               |

12.1 If you experienced one of the previous symptoms, what have you done?

- |                                                                    |                                                                       |
|--------------------------------------------------------------------|-----------------------------------------------------------------------|
| <input type="checkbox"/> Nothing                                   | <input type="checkbox"/> I went to the hospital                       |
| <input type="checkbox"/> I consulted my general practitioner       | <input type="checkbox"/> I asked to be visited by Villa Maraini staff |
| <input type="checkbox"/> I called the ministry of health freephone | <input type="checkbox"/> I took medication on my own                  |
| <input type="checkbox"/> I asked my friends and family for help    |                                                                       |
| <input type="checkbox"/> I self-quarantined                        |                                                                       |

13. Have you been vaccinated against COVID-19?

|                                           |                                                                                                                                                                                                                |                                                                 |
|-------------------------------------------|----------------------------------------------------------------------------------------------------------------------------------------------------------------------------------------------------------------|-----------------------------------------------------------------|
| <input type="checkbox"/> Yes, one dose    | 13.1 What vaccines?<br><input type="checkbox"/> Pfizer/BionTech _____<br><input type="checkbox"/> Moderna _____<br><input type="checkbox"/> AstraZeneca _____<br><input type="checkbox"/> Other _____<br>_____ | 13.2 When?<br><i>(as precise as possible)</i><br>_____<br>_____ |
| <input type="checkbox"/> Yes, two doses   |                                                                                                                                                                                                                |                                                                 |
| <input type="checkbox"/> Yes, three doses |                                                                                                                                                                                                                |                                                                 |
| <input type="checkbox"/> No               | Go to question 14                                                                                                                                                                                              |                                                                 |

14. Why? \_\_\_\_\_

15. Have you ever been diagnosed with any chronic disease? *(Multiple options can be selected)*

- |                                         |                                                                  |
|-----------------------------------------|------------------------------------------------------------------|
| <input type="checkbox"/> Hypertension   | <input type="checkbox"/> HCV <input type="checkbox"/> cured      |
| <input type="checkbox"/> Heart diseases | <input type="checkbox"/> HBV                                     |
| <input type="checkbox"/> COPD           | <input type="checkbox"/> HIV <input type="checkbox"/> in therapy |
| <input type="checkbox"/> Asthma         | <input type="checkbox"/> Psychiatric/neurological                |
| <input type="checkbox"/> Diabetes       | <input type="checkbox"/> Other _____                             |
| <input type="checkbox"/> Obesity        |                                                                  |

16. Do you take medications routinely?

|                              |                                 |
|------------------------------|---------------------------------|
| <input type="checkbox"/> Yes | 16.1 What medications?<br>_____ |
| <input type="checkbox"/> No  | Go to question 17               |

17. Do you smoke?

|                              |                                                                                                                                |                                                                                                                                                     |                                                                                                                                                                                                                                        |
|------------------------------|--------------------------------------------------------------------------------------------------------------------------------|-----------------------------------------------------------------------------------------------------------------------------------------------------|----------------------------------------------------------------------------------------------------------------------------------------------------------------------------------------------------------------------------------------|
| <input type="checkbox"/> Yes | 17.1 What do you smoke?<br><input type="checkbox"/> Tobacco<br><input type="checkbox"/> E-cig<br><input type="checkbox"/> Htps | 17.2 How often?<br><input type="checkbox"/> Less than 1 times a week<br><input type="checkbox"/> 2-3 times a week<br><input type="checkbox"/> Daily | 17.3 How many?<br><input type="checkbox"/> Less than 5<br><input type="checkbox"/> Between 5 and 9<br><input type="checkbox"/> Between 10 and 14<br><input type="checkbox"/> Between 15 and 2<br><input type="checkbox"/> More than 20 |
| <input type="checkbox"/> No  | Go to question 18                                                                                                              |                                                                                                                                                     |                                                                                                                                                                                                                                        |

18. Did you take one or more of these substances during the pandemic period?

*(Way of intake: i.v.=intravenous, i.m.=intramuscular, f=smoked, s=sniffed, os=oral;  
 Frequency: daily/ more than 3 times a week/ during weekend/ once a week / 1-3 times a month/  
 less than 10 times a year/ 1 or 2 times a year)*

| Substance               | Way of intake | Frequency |
|-------------------------|---------------|-----------|
| Heroin                  |               |           |
| Cocaine                 |               |           |
| Street methadone        |               |           |
| Benzodiazepines         |               |           |
| Other psychiatric drugs |               |           |
| Alcohol                 |               |           |
| Cannabinoids            |               |           |
| Ketamine                |               |           |
| Ecstasy                 |               |           |
| Other _____             |               |           |

19. Do you take drugs alone?

- ☐ Alone  
☐ With others

20. Do you share the tools to take the substance?

- ☐ Never  
☐ Rarely  
☐ Sometimes  
☐ Often  
☐ Always

21. Are you being treated with replacement therapies?

|                              |                                                                                                                                                  |                 |                                                                                                                                                                              |
|------------------------------|--------------------------------------------------------------------------------------------------------------------------------------------------|-----------------|------------------------------------------------------------------------------------------------------------------------------------------------------------------------------|
| <input type="checkbox"/> Yes | 21.1 What drugs?                                                                                                                                 | 21.2 Last dose? | 21.3 Schedule and frequency                                                                                                                                                  |
|                              | <input type="checkbox"/> MTD 1%<br><input type="checkbox"/> MTD 5%<br><input type="checkbox"/> Levo MTD<br><input type="checkbox"/> Buprenorfina | _____           | <input type="checkbox"/> stable dose<br><input type="checkbox"/> variable dose<br><input type="checkbox"/> regular frequency<br><input type="checkbox"/> irregular frequency |
| <input type="checkbox"/> No  | Go to question 22                                                                                                                                |                 |                                                                                                                                                                              |

22. From the onset of the pandemic have you ever had an overdose?

|                              |                      |                                                                                                                                                                                         |
|------------------------------|----------------------|-----------------------------------------------------------------------------------------------------------------------------------------------------------------------------------------|
| <input type="checkbox"/> Yes | 22.1 How many times? | 22.2 What happened?                                                                                                                                                                     |
|                              | _____                | <input type="checkbox"/> I went to the ER<br><input type="checkbox"/> I have been assisted by Villa Maraini staff<br><input type="checkbox"/> A relatives (or similar) gave me naloxone |
| <input type="checkbox"/> No  | Go to question 23    |                                                                                                                                                                                         |

23. What type of mask do you use the most?

- ☐ FFP2 o FFP3
- ☐ Surgical mask
- ☐ Community mask (fabric or similar)

24. On a scale from 0 (never) to 10 (always), how often do you:

|                                                                   |   |   |   |   |   |   |   |   |   |   |    |
|-------------------------------------------------------------------|---|---|---|---|---|---|---|---|---|---|----|
| keep your mask indoor with non-cohabiting people?                 | 0 | 1 | 2 | 3 | 4 | 5 | 6 | 7 | 8 | 9 | 10 |
| keep you mask on outside?                                         | 0 | 1 | 2 | 3 | 4 | 5 | 6 | 7 | 8 | 9 | 10 |
| wash your hands or disinfect them with a hydroalcoholic solution? | 0 | 1 | 2 | 3 | 4 | 5 | 6 | 7 | 8 | 9 | 10 |
| keep interpersonal distance?                                      | 0 | 1 | 2 | 3 | 4 | 5 | 6 | 7 | 8 | 9 | 10 |

25. On a scale from 0 (none) to 10 (extremely), how much are you concerned about:

|            |   |   |   |   |   |   |   |   |   |   |    |
|------------|---|---|---|---|---|---|---|---|---|---|----|
| yourself   | 0 | 1 | 2 | 3 | 4 | 5 | 6 | 7 | 8 | 9 | 10 |
| your loved | 0 | 1 | 2 | 3 | 4 | 5 | 6 | 7 | 8 | 9 | 10 |

|              |   |   |   |   |   |   |   |   |   |   |    |
|--------------|---|---|---|---|---|---|---|---|---|---|----|
| ones         |   |   |   |   |   |   |   |   |   |   |    |
| other people | 0 | 1 | 2 | 3 | 4 | 5 | 6 | 7 | 8 | 9 | 10 |

**Table S3.** General characteristics of the participants that reported an incomplete vaccination cycle at the time of the survey (N=16).

|                                                | Total<br>N | (%)       | Incomplete<br>vaccination cycle<br>N | (%)     | <i>p</i> -value |
|------------------------------------------------|------------|-----------|--------------------------------------|---------|-----------------|
| Sex                                            |            |           |                                      |         | 0.999           |
| Male                                           | 169        | (84.5)    | 14                                   | (8.3)   |                 |
| Female                                         | 31         | (15.5)    | 2                                    | (6.5)   |                 |
| Age, years                                     |            |           |                                      |         | 0.574           |
| Mean (SD)                                      | 43.9       | (10.6)    | 42.4                                 | (12.3)  |                 |
| Median (IQR)                                   | 44         | (35.5-52) | 42                                   | (31-50) |                 |
| Nationality                                    |            |           |                                      |         | 0.077           |
| Italian                                        | 144        | (72.0)    | 8                                    | (5.6)   |                 |
| Non-Italian                                    | 56         | (28.0)    | 8                                    | (14.3)  |                 |
| Educational level                              |            |           |                                      |         | 0.724           |
| Middle school diploma or below                 | 100        | (50.0)    | 6                                    | (6.0)   |                 |
| High school diploma or above                   | 100        | (50.0)    | 10                                   | (10.0)  |                 |
| BMI category (N=198)                           |            |           |                                      |         | 0.433           |
| Underweight (BMI <18.5)                        | 24         | (12.3)    | 2                                    | (8.3)   |                 |
| Normal weight (BMI between 18.5 and 24.9)      | 102        | (51.2)    | 11                                   | (10.8)  |                 |
| Overweight (BMI between 25.0 and 29.9)         | 52         | (26.3)    | 3                                    | (5.8)   |                 |
| Obese (BMI > 30)                               | 20         | (10.2)    | 0                                    | (0.0)   |                 |
| Work status                                    |            |           |                                      |         | 0.966           |
| Occasional work or unemployed                  | 124        | (62.0)    | 10                                   | (8.1)   |                 |
| Stable work                                    | 76         | (38.0)    | 6                                    | (7.9)   |                 |
| Housing                                        |            |           |                                      |         | 0.867           |
| Unstable                                       | 26         | (13.0)    | 1                                    | (3.9)   |                 |
| Living alone                                   | 59         | (29.5)    | 5                                    | (8.5)   |                 |
| Living with others                             | 115        | (57.5)    | 10                                   | (8.7)   |                 |
| Number of cohabitants                          |            |           |                                      |         |                 |
| None                                           | 80         | (52.5)    | 6                                    | (7.5)   |                 |
| One or two                                     | 95         | (47.5)    | 6                                    | (6.3)   | 0.270           |
| At least three                                 | 25         | (12.5)    | 4                                    | (16.0)  |                 |
| Living with someone aged 65 years old or above |            |           |                                      |         | 0.999           |
| No                                             | 165        | (82.5)    | 14                                   | (8.5)   |                 |
| Yes                                            | 35         | (17.5)    | 2                                    | (6.7)   |                 |

BMI: body mass index (kg/height in meter<sup>2</sup>). COVID-19: coronavirus disease 2019.

Wilcoxon test for continuous variables, chi<sup>2</sup> test or Fisher's test for categorical variables.

**Table S4.** Self-reported comorbidities of the participants (N=200).

|                                   | Total |        | Adherence to COVID-19 vaccination |        | <i>p</i> -value |
|-----------------------------------|-------|--------|-----------------------------------|--------|-----------------|
|                                   | N     | (%)    | N                                 | (%)    |                 |
| Hypertension                      |       |        |                                   |        | 0.578           |
| No                                | 179   | (89.5) | 144                               | (80.4) |                 |
| Yes                               | 21    | (10.5) | 16                                | (76.2) |                 |
| Heart diseases                    |       |        |                                   |        | 0.200           |
| No                                | 192   | (96.0) | 155                               | (80.7) |                 |
| Yes                               | 8     | (4.0)  | 5                                 | (62.5) |                 |
| COPD                              |       |        |                                   |        | 0.726           |
| No                                | 187   | (93.5) | 150                               | (80.2) |                 |
| Yes                               | 13    | (6.5)  | 10                                | (76.9) |                 |
| Asthma                            |       |        |                                   |        | 0.026           |
| No                                | 187   | (93.5) | 153                               | (81.8) |                 |
| Yes                               | 13    | (6.5)  | 7                                 | (53.8) |                 |
| Diabetes                          |       |        |                                   |        | 0.999           |
| No                                | 194   | (97.0) | 155                               | (79.9) |                 |
| Yes                               | 6     | (3.0)  | 5                                 | (83.3) |                 |
| HCV                               |       |        |                                   |        | 0.292           |
| No                                | 135   | (67.5) | 110                               | (81.5) |                 |
| Yes                               | 21    | (10.5) | 14                                | (66.7) |                 |
| Cured                             | 44    | (22.0) | 36                                | (81.8) |                 |
| HBV                               |       |        |                                   |        | 0.999           |
| No                                | 186   | (93.0) | 149                               | (80.1) |                 |
| Yes                               | 14    | (7.0)  | 11                                | (78.6) |                 |
| HIV                               |       |        |                                   |        | 0.186           |
| No                                | 183   | (91.5) | 146                               | (79.8) |                 |
| Yes                               | 4     | (2.0)  | 2                                 | (50.0) |                 |
| In therapy                        | 13    | (6.5)  | 12                                | (92.3) |                 |
| Psychiatric/neurological disorder |       |        |                                   |        | 0.415           |
| No                                | 172   | (86.0) | 136                               | (79.1) |                 |
| Yes                               | 28    | (14.0) | 24                                | (85.7) |                 |
| Other (e.g., cancer, CKD)         |       |        |                                   |        | 0.275           |
| No                                | 176   | (88.0) | 143                               | (81.2) |                 |
| Si                                | 24    | (12.0) | 17                                | (70.8) |                 |

COPD: Chronic Obstructive Pulmonary Disease. HCV: Hepatitis C Virus. HBV: Hepatitis B Virus.  
 CKD: Chronic Kidney Disease.
